# Supplementary material
Source: publisher site journal article supplement (https://www.dovepress.com/article/229122)

Fig. S1. ROC curves analysis the performance of CD138 for bone destruction in MM patients.

ROC, receiver operator characteristic.


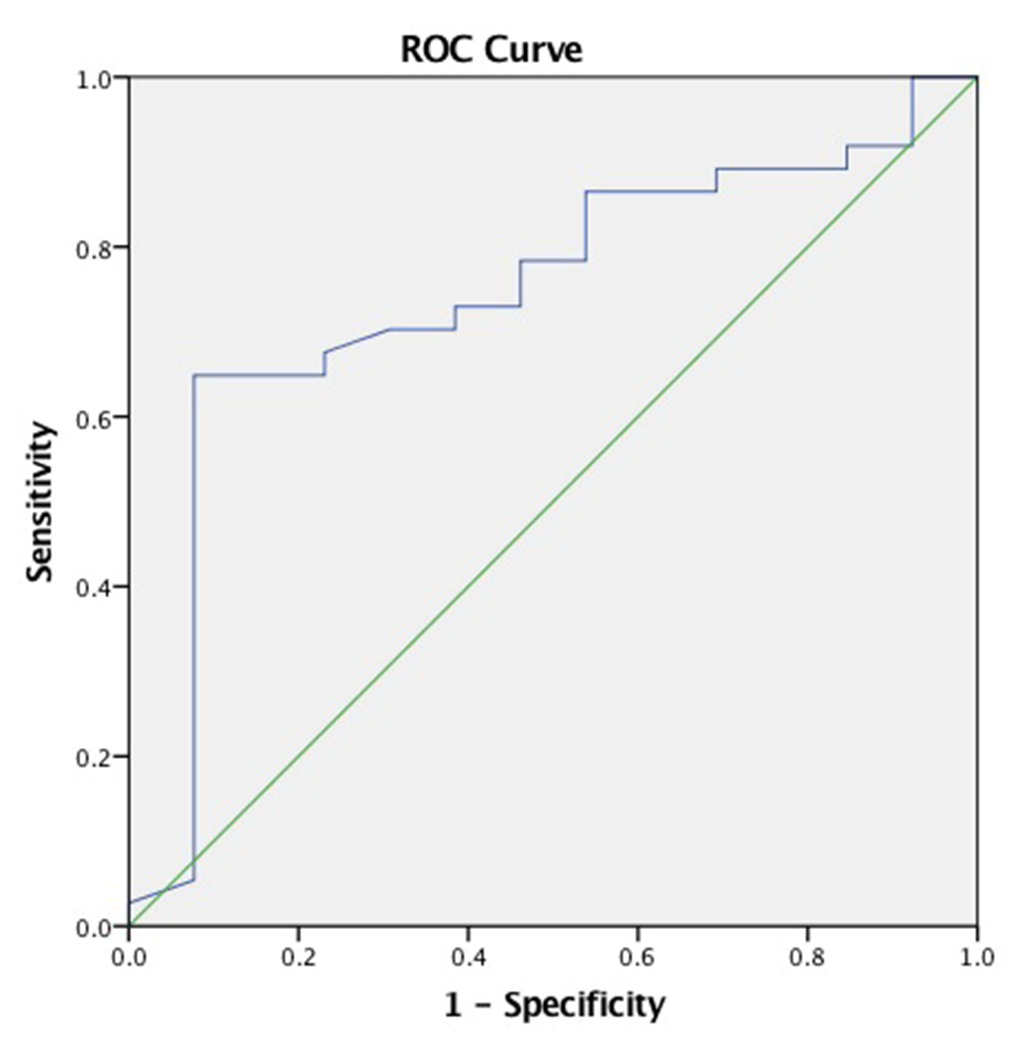


# Fig. S2 Risk evaluation of Cox regression analysis.

The hazard ratios were analyzed by Cox regression to evaluate the prognostic survival. The hazard ratio of independent factor serum β2-MG (a) and CREA (b) in myeloma bone destruction.


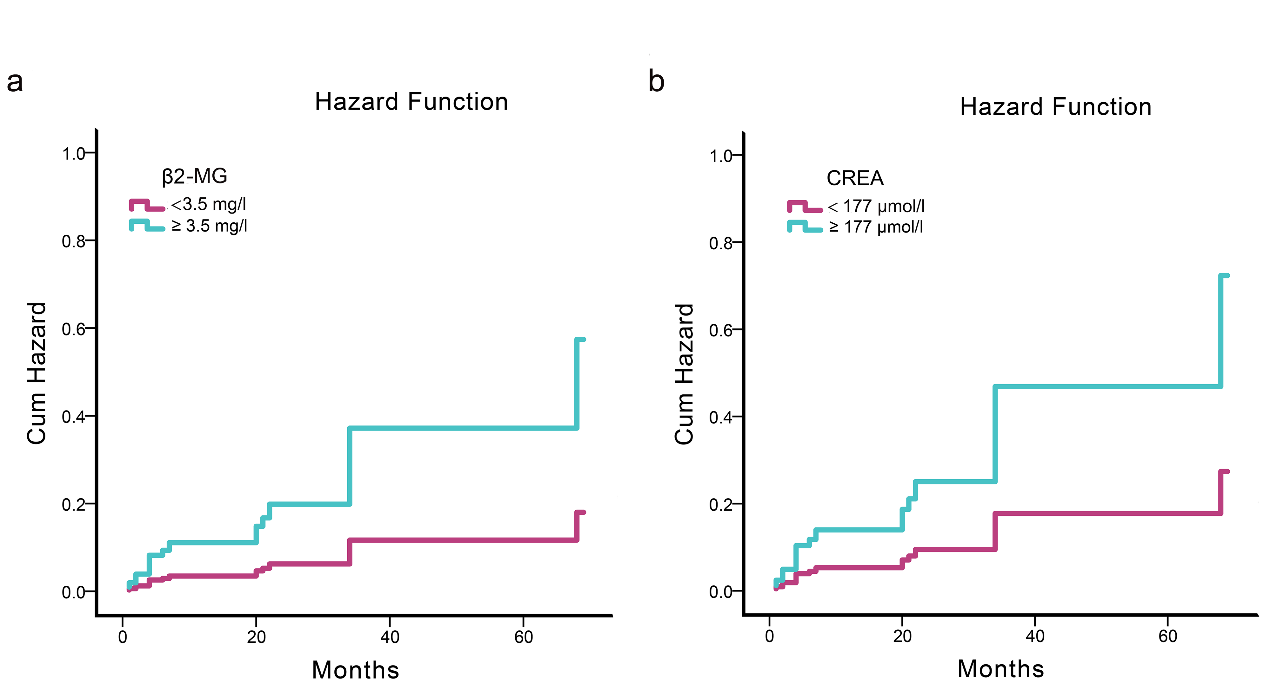

Supplement: Supplementary file 1 [file get_supplementary_file.php]
